# Supplementary material for: Exploring the Genetic Correlation Between Growth and Immunity Based on Summary Statistics of Genome-Wide Association Studies
Source: Front Genet. 2018 Sep 14;9:393. doi: 10.3389/fgene.2018.00393 (PMC6149433; doi:10.3389/fgene.2018.00393)
Supplement: Supplementary file 1 [file Table_1.XLSX]

## Sheet: Table S1
Table S1. Genetic correlation between immune and growth phenotypes.
Immune trait	Growth trait	Genetic correlation	Genetic correlation standard error	P-value	FDR
UC	LEP	0.0942	0.0673	0.1616	0.437171
UC	BL	-0.1384	0.0715	0.0529	0.229992
UC	OBESITY	0.0707	0.0506	0.1628	0.437171
UC	LM	-0.0982	0.0692	0.1556	0.437171
UC	BMI	0.1376	0.0549	0.0121	0.101782
UC	HEIGHT	-0.027	0.0328	0.4105	0.652239
UC	HC	-0.0167	0.0856	0.8456	0.977128
UC	BMD	-0.0405	0.0642	0.5279	0.725862
UC	BW	-0.0283	0.0413	0.4932	0.705276
UC	PG	0.0247	0.0705	0.7261	0.857414
UC	MBW	-0.0476	0.0563	0.3978	0.647838
MWBC	LEP	-0.0503	0.053	0.3419	0.618882
MWBC	BL	0.0015	0.0543	0.9784	0.9987
MWBC	OBESITY	-0.1178	0.0463	0.011	0.101782
MWBC	LM	0.0853	0.0479	0.0746	0.277567
MWBC	BMI	-0.1092	0.0411	0.0079	0.0941417
MWBC	HEIGHT	-0.0017	0.0223	0.9403	0.9987
MWBC	HC	-0.0896	0.0633	0.1568	0.437171
MWBC	BMD	0.0276	0.0494	0.5766	0.746026
MWBC	BW	-0.1528	0.0275	2.69e-08	1.92e-06
MWBC	PG	0.1114	0.0545	0.0408	0.201186
MWBC	MBW	-0.1126	0.0449	0.0121	0.101782
LYMPH	LEP	0.0567	0.0545	0.2978	0.567805
LYMPH	BL	-0.0493	0.0553	0.3723	0.641433
LYMPH	OBESITY	-0.0332	0.0409	0.4168	0.654971
LYMPH	LM	0.1045	0.0454	0.0213	0.121836
LYMPH	BMI	-0.1024	0.0381	0.0071	0.0941417
LYMPH	HEIGHT	-0.0267	0.0236	0.258	0.538089
LYMPH	HC	0.0365	0.062	0.5558	0.746026
LYMPH	BMD	0.0544	0.0486	0.2634	0.538089
LYMPH	BW	-0.1183	0.0348	0.0007	0.0166833
LYMPH	PG	0.0623	0.0486	0.1998	0.476052
LYMPH	MBW	-0.0514	0.0484	0.2879	0.563968
WBC	LEP	-0.0194	0.054	0.7201	0.857414
WBC	BL	-0.0052	0.0536	0.9222	0.9987
WBC	OBESITY	-0.1036	0.0454	0.0225	0.12375
WBC	LM	0.1034	0.0461	0.0247	0.130819
WBC	BMI	-0.1266	0.0408	0.0019	0.0339625
WBC	HEIGHT	-0.0086	0.0231	0.7096	0.857414
WBC	HC	-0.0648	0.0609	0.2875	0.563968
WBC	BMD	0.0378	0.0495	0.4453	0.660306
WBC	BW	-0.1639	0.0281	5.74e-09	8.21e-07
WBC	PG	0.1152	0.0532	0.0302	0.154236
WBC	MBW	-0.1102	0.0468	0.0186	0.110825
MONO	LEP	0.0789	0.0568	0.1651	0.437171
MONO	BL	-0.0696	0.0507	0.17	0.437171
MONO	OBESITY	-0.0601	0.0421	0.1534	0.437171
MONO	LM	0.0639	0.0457	0.1622	0.437171
MONO	BMI	-0.1129	0.0358	0.0016	0.0326857
MONO	HEIGHT	-0.0414	0.0223	0.064	0.247351
MONO	HC	0.0016	0.0519	0.9756	0.9987
MONO	BMD	-0.0026	0.0451	0.9542	0.9987
MONO	BW	-0.0821	0.032	0.0102	0.101782
MONO	PG	0.0884	0.0587	0.132	0.419467
MONO	MBW	-0.0561	0.0484	0.2467	0.538089
ALL	LEP	0.0466	0.0599	0.4364	0.659155
ALL	BL	0.0003	0.0587	0.9962	0.9987
ALL	OBESITY	0.0358	0.0462	0.4379	0.659155
ALL	LM	0.0291	0.0523	0.5783	0.746026
ALL	BMI	0.0921	0.0388	0.0176	0.110825
ALL	HEIGHT	-0.0246	0.0272	0.3649	0.641433
ALL	HC	0.0215	0.0628	0.7315	0.857414
ALL	BMD	0.0196	0.0513	0.7027	0.857414
ALL	BW	-0.0298	0.0345	0.3874	0.647838
ALL	PG	0.0749	0.0618	0.2252	0.511168
ALL	MBW	-0.0446	0.0505	0.3768	0.641457
CD	LEP	-0.0535	0.0626	0.3929	0.647838
CD	BL	0.0037	0.0604	0.9512	0.9987
CD	OBESITY	-0.0621	0.049	0.2052	0.476052
CD	LM	8.3e-05	0.0497	0.9987	0.9987
CD	BMI	-0.068	0.0432	0.1158	0.394081
CD	HEIGHT	-0.0054	0.0296	0.8557	0.978921
CD	HC	-0.0468	0.07	0.5036	0.713018
CD	BMD	-0.0843	0.0549	0.125	0.40625
CD	BW	-0.0156	0.0342	0.6498	0.8151
CD	PG	0.0625	0.0626	0.3176	0.597589
CD	MBW	-0.0296	0.0509	0.56	0.746026
IBD	LEP	0.0002	0.0588	0.9978	0.9987
IBD	BL	-0.0668	0.0607	0.2709	0.545615
IBD	OBESITY	0.0171	0.0457	0.7076	0.857414
IBD	LM	-0.0385	0.054	0.4751	0.686256
IBD	BMI	0.0343	0.0462	0.4579	0.66816
IBD	HEIGHT	-0.0218	0.0287	0.4479	0.660306
IBD	HC	-0.0386	0.0703	0.583	0.746026
IBD	BMD	-0.0733	0.0548	0.1812	0.454589
IBD	BW	-0.0275	0.0344	0.4243	0.659155
IBD	PG	0.0301	0.0616	0.6244	0.79017
IBD	MBW	-0.0468	0.0491	0.3406	0.618882
ATH	LEP	0.1255	0.0917	0.1712	0.437171
ATH	BL	0.004	0.0827	0.9612	0.9987
ATH	OBESITY	0.0741	0.0581	0.2024	0.476052
ATH	LM	-0.071	0.0674	0.2919	0.564077
ATH	BMI	0.0656	0.0509	0.1975	0.476052
ATH	HEIGHT	-0.0325	0.0363	0.371	0.641433
ATH	HC	0.0147	0.0897	0.8702	0.987608
ATH	BMD	0.0075	0.0715	0.917	0.9987
ATH	BW	-0.0006	0.048	0.9906	0.9987
ATH	PG	-0.1472	0.0829	0.0757	0.277567
ATH	MBW	-0.0237	0.0673	0.7243	0.857414
EO	LEP	-0.0277	0.0506	0.5843	0.746026
EO	BL	-0.0557	0.0396	0.1594	0.437171
EO	OBESITY	-0.0214	0.0347	0.5376	0.73216
EO	LM	0.0433	0.0449	0.3354	0.618882
EO	BMI	-0.0215	0.0336	0.5211	0.723469
EO	HEIGHT	-0.0013	0.0245	0.9574	0.9987
EO	HC	0.1716	0.0592	0.0037	0.0587889
EO	BMD	0.0083	0.0432	0.8473	0.977128
EO	BW	-0.079	0.0295	0.0074	0.0941417
EO	PG	0.0277	0.0485	0.5672	0.746026
EO	MBW	-0.0871	0.0513	0.0895	0.312159
GRAN	LEP	-0.0584	0.052	0.262	0.538089
GRAN	BL	0.0081	0.0551	0.8832	0.994469
GRAN	OBESITY	-0.1132	0.046	0.0139	0.110428
GRAN	LM	0.0834	0.0481	0.0833	0.297797
GRAN	BMI	-0.0978	0.0415	0.0184	0.110825
GRAN	HEIGHT	0.0026	0.0222	0.9073	0.9987
GRAN	HC	-0.0931	0.0638	0.1446	0.437171
GRAN	BMD	0.0321	0.0495	0.5172	0.723469
GRAN	BW	-0.1499	0.0276	5.72e-08	2.73e-06
GRAN	PG	0.1056	0.0533	0.0476	0.226893
GRAN	MBW	-0.1128	0.0446	0.0114	0.101782
NEUT	LEP	-0.0609	0.0525	0.2462	0.538089
NEUT	BL	0.0204	0.0553	0.7119	0.857414
NEUT	OBESITY	-0.1107	0.0465	0.0173	0.110825
NEUT	LM	0.075	0.048	0.1185	0.394081
NEUT	BMI	-0.099	0.0416	0.0173	0.110825
NEUT	HEIGHT	0.002	0.0222	0.9277	0.9987
NEUT	HC	-0.1202	0.0634	0.0579	0.229992
NEUT	BMD	0.0396	0.0501	0.4298	0.659155
NEUT	BW	-0.1464	0.0279	1.54e-07	5.51e-06
NEUT	PG	0.1025	0.0538	0.0568	0.229992
NEUT	MBW	-0.1045	0.0435	0.0162	0.110825
BASO	LEP	0.0557	0.0661	0.3998	0.647838
BASO	BL	-0.0098	0.0786	0.9006	0.9987
BASO	OBESITY	-0.0623	0.0554	0.2609	0.538089
BASO	LM	0.1175	0.0614	0.0556	0.229992
BASO	BMI	-0.0506	0.0567	0.3717	0.641433
BASO	HEIGHT	-0.0521	0.0271	0.0548	0.229992
BASO	HC	0.0836	0.0739	0.2577	0.538089
BASO	BMD	-0.0502	0.0601	0.4032	0.647838
BASO	BW	-0.1457	0.0367	7.19e-05	0.00205634
BASO	PG	0.0934	0.0739	0.2064	0.476052
BASO	MBW	-0.1091	0.0566	0.0537	0.229992
