# Supplementary material for: Exploring the Genetic Correlation Between Growth and Immunity Based on Summary Statistics of Genome-Wide Association Studies
Source: Front Genet. 2018 Sep 14;9:393. doi: 10.3389/fgene.2018.00393 (PMC6149433; doi:10.3389/fgene.2018.00393)
Supplement: Supplementary file 2 [file Table_2.XLSX]

## Sheet: Table S2
Table S2. The significant "cause and effect" relationship between immune and growth phenotypes
Exposure	Outcome	bxy	SE	P-value	NSNP	NFLT	Pleiotropic SNPs
WBC	HEIGHT	-0.0769857	0.0128795	2.26753e-09	83	30	rs7917772;rs7082470;rs3747869;rs10786327;rs174549;rs8108722;rs7513208;rs10178094; rs1260326;rs13125760;rs17709145;rs2075800;rs914547;rs10087240;rs1982094;rs2980439; rs1681630;rs4794859;rs11654954;rs4076006;rs540652;rs7701414;rs1009181;rs1265097; rs2523589;rs2736189;rs9271775;rs241448;rs42039;rs8413;
MWBC	HEIGHT	-0.0855452	0.014499	3.63321e-09	69	22	rs3747869;rs174555;rs12440045;rs13125760;rs17709192;rs2075800;rs2954031;rs1982094 ;rs2979489;rs10104003;rs2980439;rs385893;rs11654954;rs4076006;rs540652;rs780094; rs7701414;rs1265097;rs2523589;rs241448;rs42039;rs8413;
NEUT	HEIGHT	-0.081671	0.0146057	2.24854e-08	69	22	rs4761234;rs12440045;rs7168592;rs17709145;rs2596501;rs177465;rs1870028;rs2980869; rs1982094;rs2980439;rs460154;rs385893;rs11654954;rs4076006;rs540652;rs780094; rs7701414;rs1265097;rs2075800;rs241448;rs42039;rs8413;
GRAN	HEIGHT	-0.074264	0.0152303	1.08223e-06	61	23	rs7082470;rs174555;rs4761234;rs12440045;rs7168592;rs11920354;rs17709145;rs177465; rs2980869;rs1982094;rs2980439;rs385893;rs11654954;rs4076006;rs540652;rs780094; rs7701414;rs1265097;rs2523589;rs2075800;rs241448;rs42039;rs8413;
HEIGHT	ALL	-0.0364739	0.00960038	0.000145155	894	41	rs7899004;rs4918068;rs625735;rs606978;rs2649996;rs6489244;rs7980687;rs2363704; rs1410113;rs9600340;rs2208397;rs11630656;rs12441344;rs2338115;rs11654954; rs4986172;rs2806561;rs16829945;rs4076006;rs17387330;rs2815379;rs2811594; rs13043392;rs1882286;rs724016;rs4686904;rs4681933;rs16994718;rs11743851; rs10477741;rs13194508;rs10498730;rs7756117;rs1009181;rs13214703;rs9272775; rs241448;rs2296330;rs3778…
